# Supplementary material for: The outflow of Asian biomass burning carbonaceous aerosol into the UTLS in spring: Radiative effects seen in a global model
Source: Copernicus journal article supplement (doi:10.5194/acp-2021-494), 2021-06-18
Supplement: Supplementary file 1 [file acp-2021-494-supplement.pdf]

## The outflow of Asian biomass burning carbonaceous aerosol into the UTLS in spring:

### Radiative effects seen in a global model

Prashant Chavan<sup>1,2</sup>, Suvarna Fadnavis<sup>1\*</sup>, Tanusri Chakroborty<sup>1</sup>, Christopher E. Sioris<sup>3</sup>, Sabine Griessbach<sup>4</sup>, Rolf Müller<sup>5</sup>

<sup>1</sup>Indian Institute of Tropical Meteorology, Center for climate change, MoES, India

<sup>2</sup>Savitribai Phule Pune University, Pune, India

<sup>3</sup>Air Quality Research Division, Environment and Climate Change, Toronto, Canada

<sup>4</sup>Forschungszentrum Jülich GmbH, Jülich Supercomputing Center, Jülich, Germany,

<sup>5</sup>Forschungszentrum Jülich GmbH, IEK7, Jülich, Germany

Corresponding author email: suvarna@tropmet.res.in

### Supplementary Figures

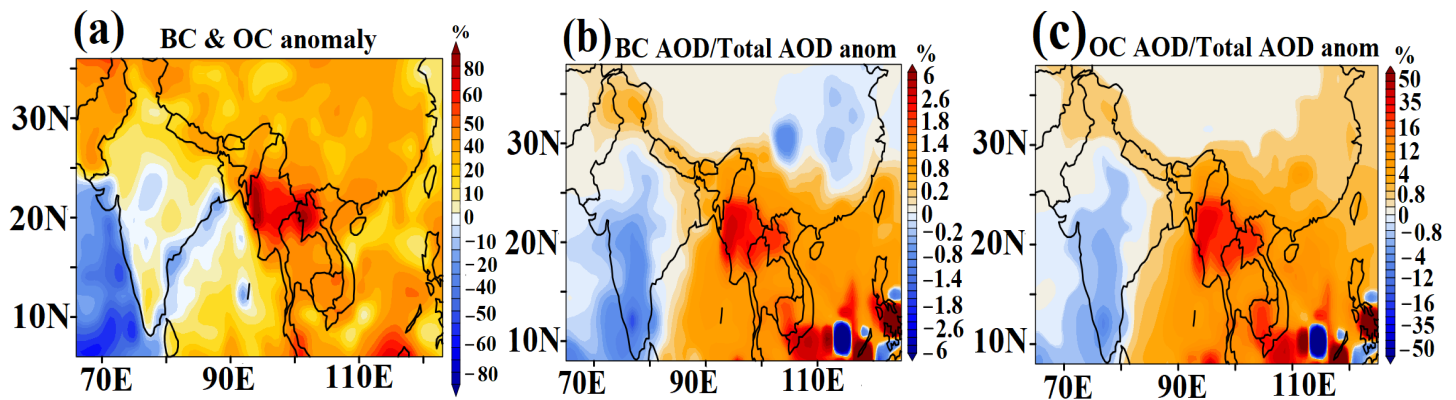

Figure S1: Distribution of anomalies (BMAeroon - BMAerooff) for spring 2013 (a) atmospheric column concentration of BC and OC together (%), (b) ratio of BC-AOD to the total AOD (%), (c) ratio of OC-AOD to total AOD (%).

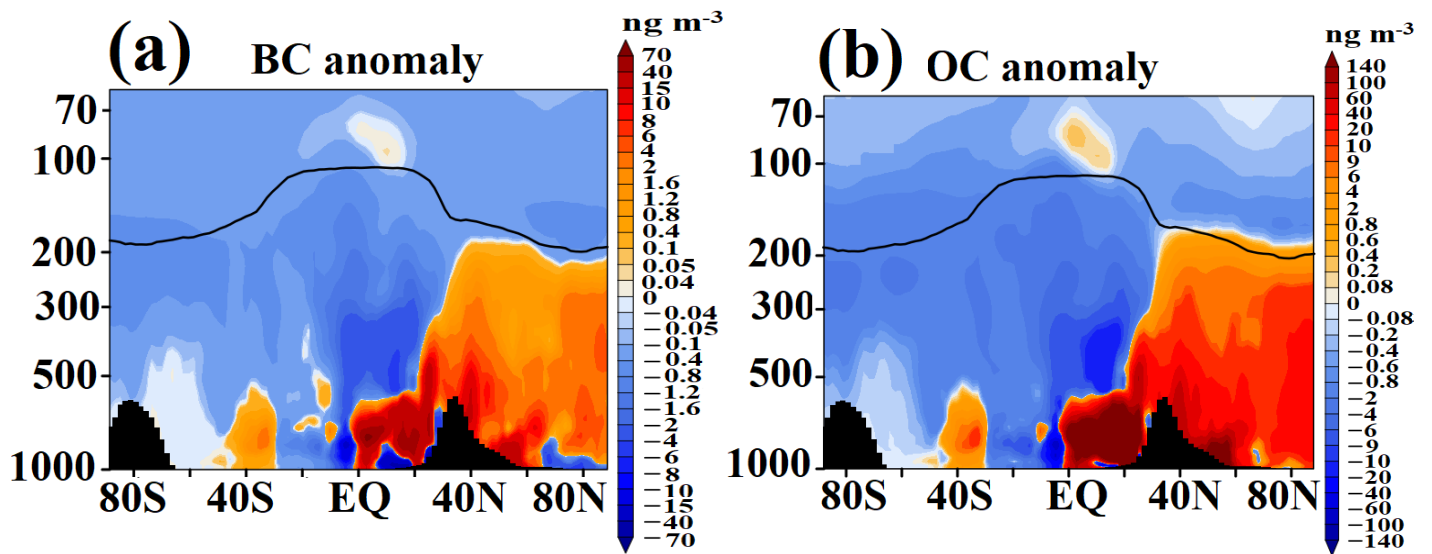

Figure S2: Vertical section of anomalies of BC ( $\text{ng m}^{-3}$ ) for spring 2013 from ECHAM6-HAMMOZ simulations (BMaeroon – Bmaerooff) (a) latitude-pressure section over South Asia (averaged for  $70^{\circ}\text{E}$ - $95^{\circ}\text{E}$ ); (b) same as (a) but for OC.

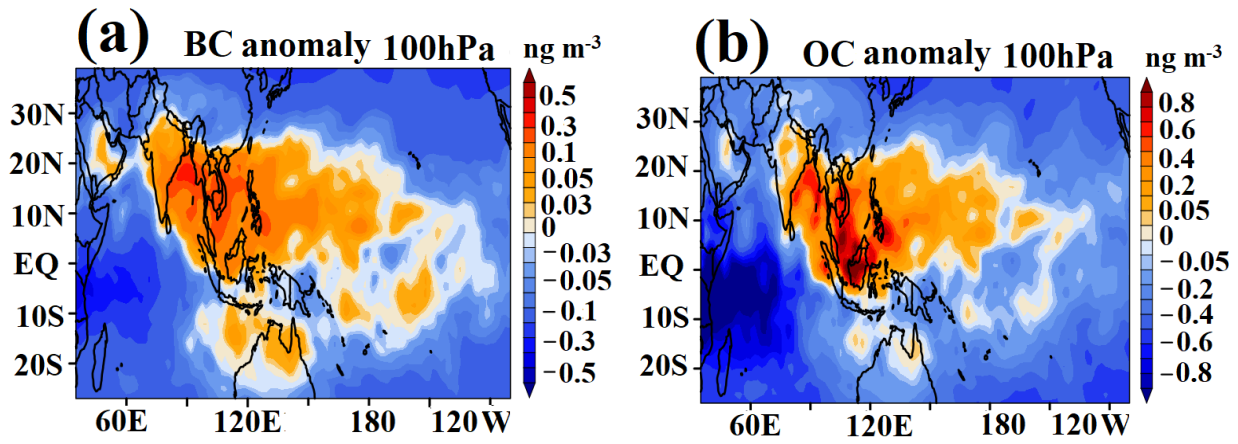

Figure S3: Horizontal distribution of anomalies of (a) BC ( $\text{ng m}^{-3}$ ), (b) OC ( $\text{ng m}^{-3}$ ) at 100 hPa from ECHAM6-HAMMOZ simulation (BMaeroon - BMaerooff).

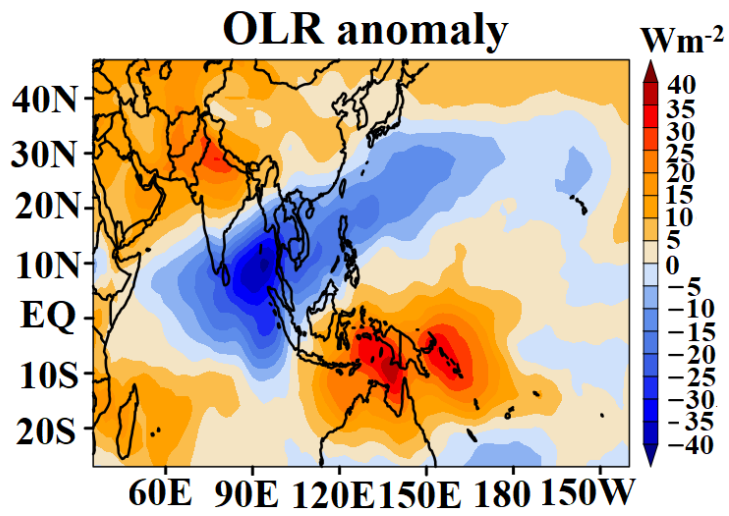

Figure S4. Distribution of anomalies in OLR ( $\text{Wm}^{-2}$ ) from the ECHAM6-HAMMOZ simulations (BMAeroon - BMAerooff) averaged for spring 2013.
